# Supplementary material for: Valence tautomerism interconversion triggers transition to stable charge distribution in solid polymeric cobalt–polyoxolene complexes
Source: Royal Society of Chemistry journal article supplement (doi:10.1039/b710493f), 2007-01-01
Supplement: b710493f.pdf [file b710493f.pdf]

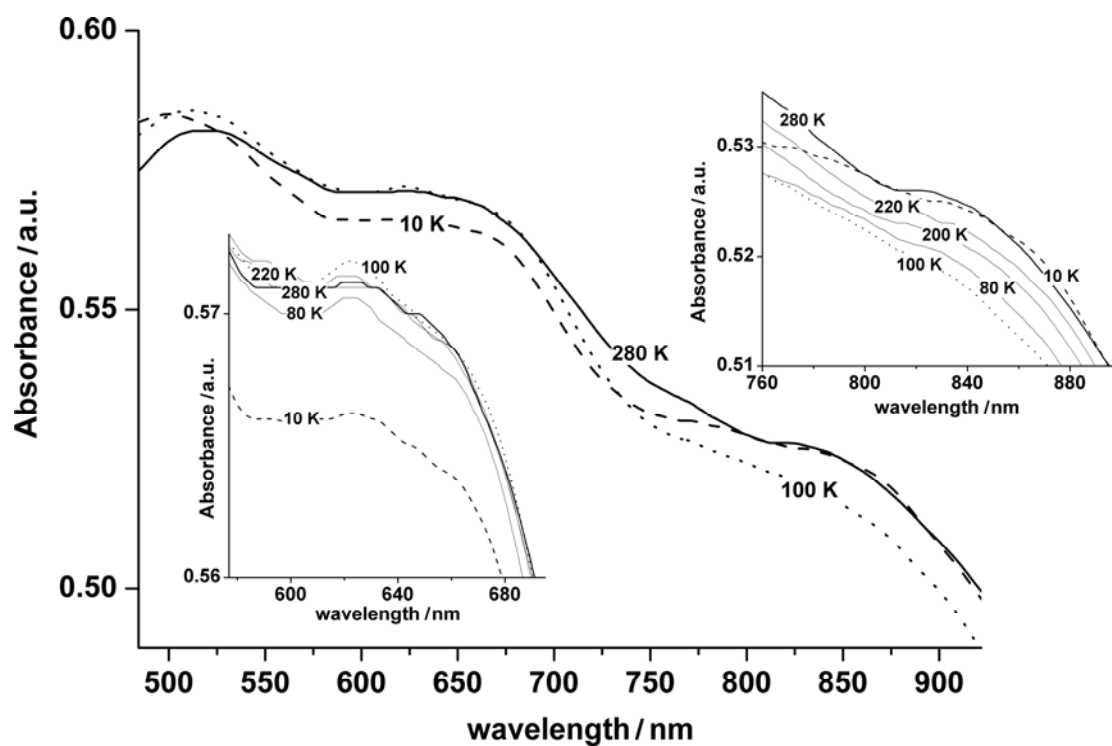

**Fig. S1.** Variable temperature UV-Vis spectra.

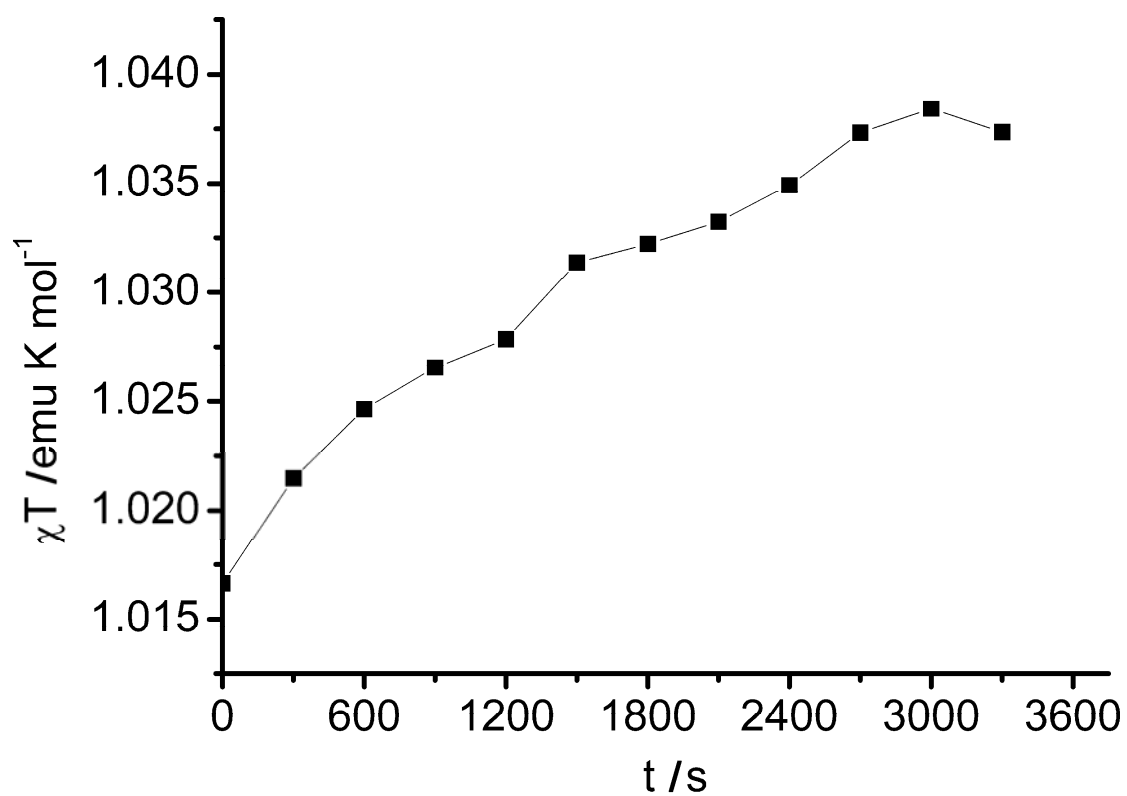

**Fig. S2.** Time dependence of magnetic susceptibility of **1** and **2** at 310 K.

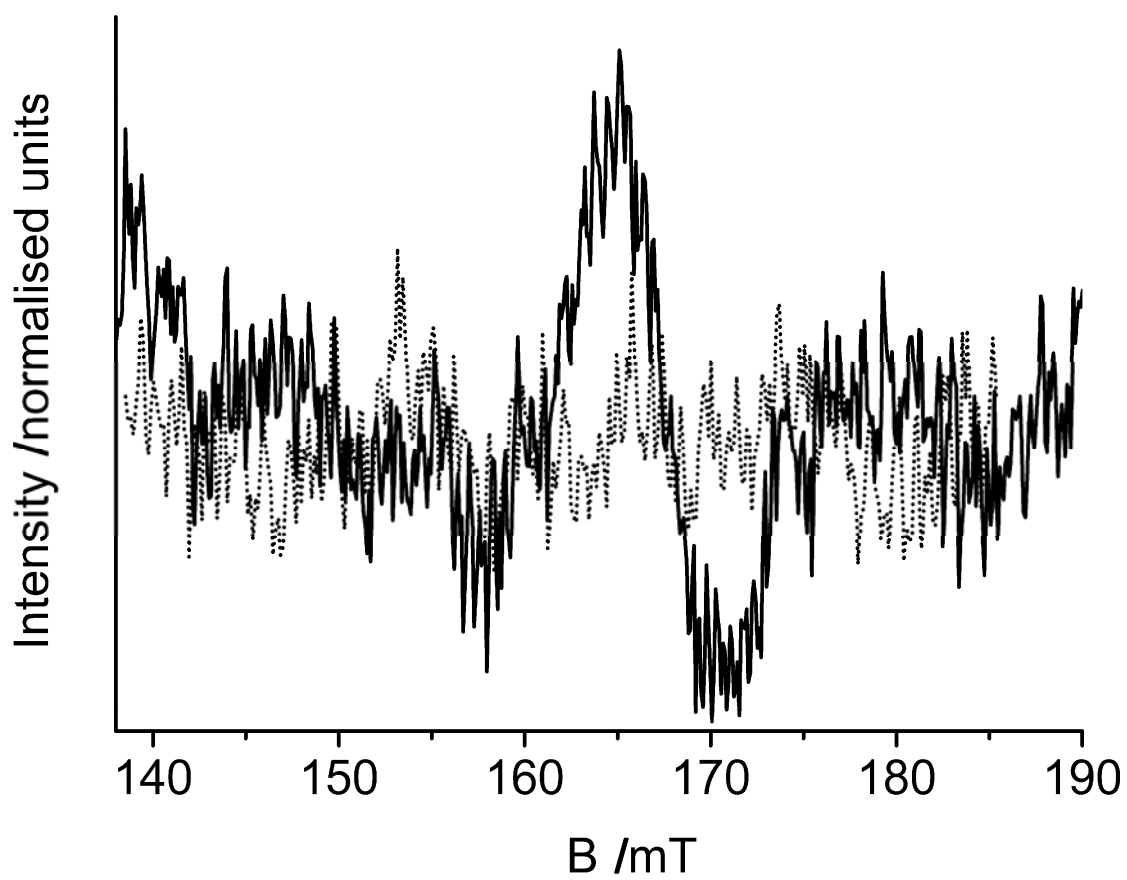

**Fig. S3.** Variation of half-field EPR signal with sample ageing.

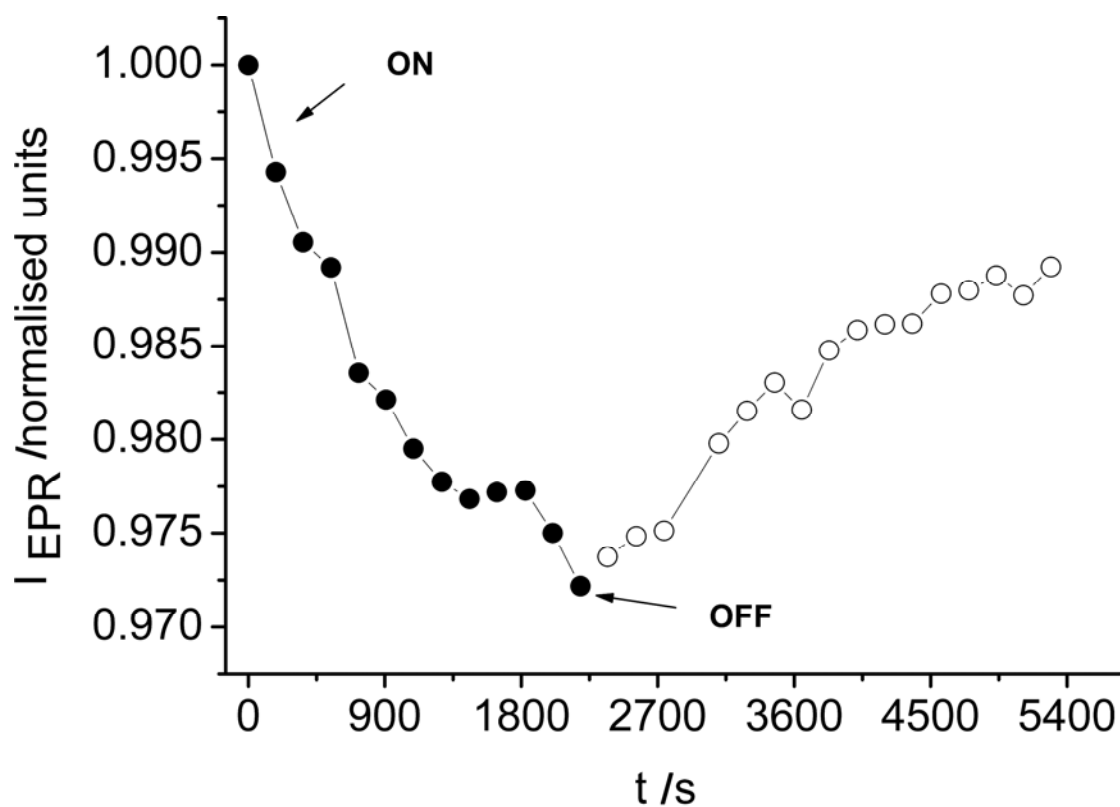

**Fig. S4.** Variation of integrated intensity of central EPR line during and after irradiation.

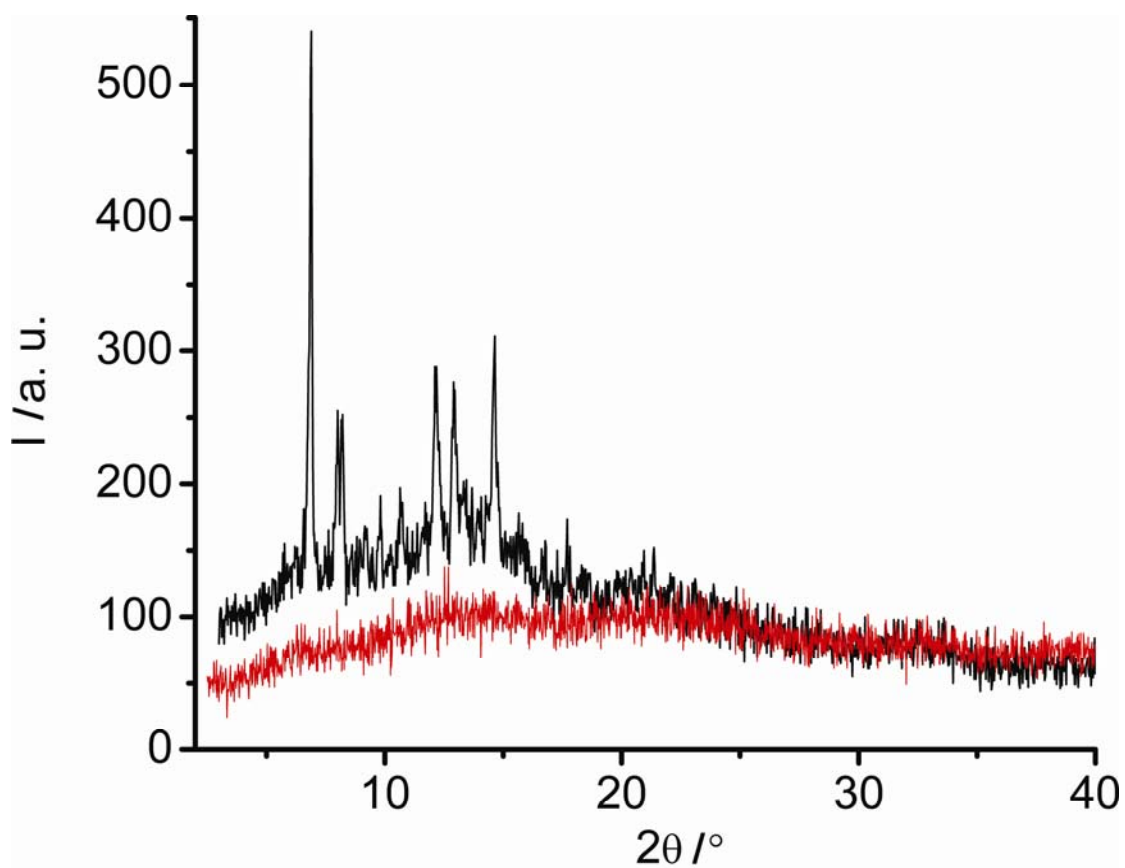

**Fig. S5.** Powder X-Ray pattern of **1**.
